# Supplementary material for: Proteins linking APOE ɛ4 with Alzheimer's disease
Source: PubMed Central journal article supplement — Alzheimers Dement. 2024 Jun 10;20(7):4499–511. doi: 10.1002/alz.13867 (PMC11247662; doi:10.1002/alz.13867), 2024-06-10
Supplement: ALZ-20-4499-s002.pdf [file ALZ-20-4499-s002.pdf]

| <b>Content</b>                                                                                                                                                                                                                       | <b>Pages</b> |
|--------------------------------------------------------------------------------------------------------------------------------------------------------------------------------------------------------------------------------------|--------------|
| <b>eMethods</b>                                                                                                                                                                                                                      | <b>2-3</b>   |
| <b>Table e-1.</b> Associations of the <i>APOE</i> $\epsilon 4$ -related proteins with amyloid- $\beta$ ( $A\beta$ ), tau tangle, and rate of global cognition decline.                                                               | <b>4</b>     |
| <b>Table e-2.</b> Associations of the <i>APOE</i> $\epsilon 4$ -related proteins with rates of decline in 5 cognitive domains.                                                                                                       | <b>5</b>     |
| <b>Table e-3.</b> Associations of the <i>APOE</i> $\epsilon 4$ -related proteins with their bulk tissue RNA expression levels.                                                                                                       | <b>6</b>     |
| <b>Table e-4.</b> Associations of <i>APOE</i> $\epsilon 4$ with RNA expression levels of the genes of proteins related to <i>APOE</i> $\epsilon 4$ in participants with valid proteomic data (n=596).                                | <b>7</b>     |
| <b>Table e-5.</b> Associations of <i>APOE</i> $\epsilon 4$ with RNA expression levels of the genes of proteins related to <i>APOE</i> $\epsilon 4$ in all participants with bulk tissue RNASeq expression data (n=1196).             | <b>8</b>     |
| <b>Table e-6.</b> Associations of <i>APOE</i> $\epsilon 4$ with single nuclei RNA expression levels of the genes of proteins related to <i>APOE</i> $\epsilon 4$ in participants with proteomic data (n=218).                        | <b>9-10</b>  |
| <b>Table e-7.</b> Associations of <i>APOE</i> $\epsilon 4$ with single nuclei RNA expression levels of the genes of proteins related to <i>APOE</i> $\epsilon 4$ in all participants with single nuclei RNA expression data (n=424). | <b>11-12</b> |
| <b>Table e-8.</b> Associations of the 18 <i>APOE</i> $\epsilon 4$ -related proteins with AD polygenic risk scores that included risk variants except <i>APOE</i> $\epsilon 4$ .                                                      | <b>13</b>    |
| <b>Table e-9.</b> Protein levels and number of missing of 18 <i>APOE</i> $\epsilon 4$ -related proteins.                                                                                                                             | <b>14</b>    |
| <b>Table e-10.</b> Characteristic of 302 participants who had non-missing levels of 15 <i>APOE</i> $\epsilon 4$ -related proteins.                                                                                                   | <b>15-16</b> |
| <b>Table e-11.</b> Effect sizes of the 5 and 2 <i>APOE</i> $\epsilon 4$ -related proteins associated with amyloid- $\beta$ and tau tangles, respectively.                                                                            | <b>17</b>    |
| <b>Table e-12.</b> Associations of <i>APOE</i> $\epsilon 4$ with amyloid- $\beta$ ( $A\beta$ ) and tau tangle with and without controlling for <i>APOE</i> $\epsilon 4$ -related proteins.                                           | <b>18</b>    |
| <b>Table e-13.</b> Associations of <i>APOE</i> $\epsilon 4$ -related proteins with pathological diagnosis of AD and with non-AD brain pathologies.                                                                                   | <b>19-20</b> |

## **eMethods**

*Postmortem pathological assessments of non-AD brain pathologies.*

*Transactive response DNA binding protein-43 (TDP-43).* Using an antibody against phosphorylated TDP-43, brain sections were examined for the presence of TDP-43 aggregates, which were summarized by a binary variable indicating presence of TDP-43 aggregates in hippocampus, entorhinal cortex, or other brain cortices[1]. The examined brain regions were the amygdala, hippocampus (CA1, subiculum), dentate gyrus, entorhinal cortex, and neocortices (orbital frontal, midfrontal, anterior temporal, and middle temporal cortices).

*Hippocampal sclerosis.* Coronal sections of mid-hippocampus were examined for hippocampal sclerosis, which was summarized by a binary variable indicating severe neuronal loss and gliosis in CA1 and/or subiculum[2].

*Lewy bodies.* Immunohistochemical staining using antibodies against  $\alpha$ -synuclein were in place for identification of Lewy bodies, which were summarized by a binary variable indicating presence of Lewy bodies in any brain region. The examined brain regions were midfrontal, midtemporal, inferior parietal, anterior cingulate, entorhinal, hippocampus, basal ganglia, and midbrain[3].

*Macroinfarcts.* Sections of the fixed hemispheres and photos of slabs of frozen hemispheres were examined for the presence of infarcts, which were confirmed by microscopic examination. In the current study, we only included chronic infarcts because we were interested in chronic pathologies that were accumulating over time and were more representative of the pathologies underlying cognitive decline in older adults, as done in our previous publications[4]. Chronic macroinfarcts were pathologically diagnosed as cavities surrounded by gliosis and containing few macrophages, and were summarized by a binary variable indicating presence of one or more macroinfarcts.

*Microinfarcts.* Brain sections stained by Hematoxylin and Eosin were examined for microinfarcts, which are identifiable by definition only under microscope. Similar to macroinfarcts, only chronic microinfarcts were included in the current study that were summarized by a binary variable indicating presence of one or more microinfarcts. The examined brain regions were six cortical brain regions (frontal, temporal, entorhinal, hippocampal, parietal, and anterior cingulate), two subcortical regions (anterior basal ganglia and thalamus), and the midbrain[4].

*Intracranial atherosclerosis.* Large arteries of Circle of Willis and their proximal branches were examined for atherosclerosis, which was scored using a semiquantitative scale including none, mild, moderate, severe that was based on the severity of atherosclerosis in each vessel and number of vessels involved. In the current study, we used a binary variable indicating presence of moderate to severe atherosclerosis[5].

*Basal ganglia arteriolosclerosis.* Small arteries and arterioles in the anterior basal ganglia region (including caudate, putamen, internal capsule, and adjacent globus pallidus) were examined for arterial wall thickening and lumen narrowing, which was scored using a semiquantitative scale

(none, mild, moderate, severe). In the current study, arteriolosclerosis was summarized using a binary variable indicating presence of moderate to severe arteriolosclerosis[6].

*Cerebral amyloid angiopathy (CAA)*. Immunohistochemical staining using antibodies against amyloid- $\beta$  was in place for visualization of amyloid- $\beta$  in the walls of parenchymal and meningeal vessels in four regions: midfrontal, midtemporal, angular, and calcarine cortices. Severity of amyloid- $\beta$  in the vessel walls was scored using a semiquantitative scale, which was summarized in the current study by a binary variable indicating moderate to severe CAA[7].

#### References.

- [1] Oveisgharan S, Yu L, Agrawal S, Nag S, Bennett DA, Buchman AS, et al. Relation of Motor Impairments to Neuropathologic Changes of Limbic-Predominant Age-Related TDP-43 Encephalopathy in Older Adults. *Neurology* 2023;101:e1542–53. <https://doi.org/10.1212/WNL.0000000000207726>.
- [2] Nag S, Yu L, Capuano AW, Wilson RS, Leurgans SE, Bennett DA, et al. Hippocampal sclerosis and TDP-43 pathology in aging and Alzheimer disease. *Ann Neurol* 2015;77:942–52. <https://doi.org/10.1002/ana.24388>.
- [3] Agrawal S, Yu L, Nag S, Arfanakis K, Barnes LL, Bennett DA, et al. The association of Lewy bodies with limbic-predominant age-related TDP-43 encephalopathy neuropathologic changes and their role in cognition and Alzheimer’s dementia in older persons. *Acta Neuropathol Commun* 2021;9:156. <https://doi.org/10.1186/s40478-021-01260-0>.
- [4] Oveisgharan S, Dawe RJ, Yu L, Kapasi A, Arfanakis K, Hachinski V, et al. Frequency and underlying pathology of pure vascular cognitive impairment. *JAMA Neurol* 2022;79:1277–86. <https://doi.org/10.1001/jamaneurol.2022.3472>.
- [5] Oveisgharan S, Yu L, Barnes LL, Agrawal S, Schneider JA, Bennett DA, et al. Association of statins with cerebral atherosclerosis and incident parkinsonism in older adults. *Neurology* 2022;10.1212/WNL.0000000000200182. <https://doi.org/10.1212/WNL.0000000000200182>.
- [6] Oveisgharan S, Kim N, Agrawal S, Yu L, Leurgans S, Kapasi A, et al. Brain and spinal cord arteriolosclerosis and its associations with cerebrovascular disease risk factors in community-dwelling older adults. *Acta Neuropathol* 2023;145:219–33. <https://doi.org/10.1007/s00401-022-02527-z>.
- [7] Boyle PA, Yu L, Nag S, Leurgans S, Wilson RS, Bennett DA, et al. Cerebral amyloid angiopathy and cognitive outcomes in community-based older persons. *Neurology* 2015;85:1930–6. <https://doi.org/10.1212/WNL.0000000000002175>.

**Table e-1.** Associations of the *APOE*  $\epsilon 4$ -related proteins with amyloid- $\beta$  (A $\beta$ ), tau tangle, and rate of global cognition decline.

| Uniprot ID | Gene           | Protein name                                      | <i>APOE</i> $\epsilon 4$        | Amyloid- $\beta$                | Tau tangle                      | Rate of global cognition decline |
|------------|----------------|---------------------------------------------------|---------------------------------|---------------------------------|---------------------------------|----------------------------------|
|            |                |                                                   | Estimate (SE), P-value          |                                 |                                 |                                  |
| P21741     | <i>MDK</i>     | Midkine                                           | <b>0.756 (0.094), &lt;0.001</b> | <b>0.545 (0.022), &lt;0.001</b> | <b>0.458 (0.040), &lt;0.001</b> | <b>-0.024 (0.004), &lt;0.001</b> |
| Q9H4F8     | <i>SMOC1</i>   | Sparc-related modular calcium-binding protein 1   | <b>0.736 (0.094), &lt;0.001</b> | <b>0.540 (0.022), &lt;0.001</b> | <b>0.490 (0.039), &lt;0.001</b> | <b>-0.026 (0.004), &lt;0.001</b> |
| P05067     | <i>APP</i>     | Amyloid precursor protein                         | <b>0.709 (0.095), &lt;0.001</b> | <b>0.512 (0.023), &lt;0.001</b> | <b>0.463 (0.040), &lt;0.001</b> | <b>-0.027 (0.004), &lt;0.001</b> |
| O95631     | <i>NTN1</i>    | Netrin-1                                          | <b>0.697 (0.095), &lt;0.001</b> | <b>0.546 (0.022), &lt;0.001</b> | <b>0.501 (0.039), &lt;0.001</b> | <b>-0.027 (0.004), &lt;0.001</b> |
| Q92743     | <i>HTRA1</i>   | Serine protease HTRA1                             | <b>0.686 (0.095), &lt;0.001</b> | <b>0.282 (0.029), &lt;0.001</b> | <b>0.357 (0.041), &lt;0.001</b> | <b>-0.024 (0.004), &lt;0.001</b> |
| Q8N474     | <i>SFRP1</i>   | Secreted frizzled-related protein 1               | <b>0.776 (0.108), &lt;0.001</b> | <b>0.525 (0.028), &lt;0.001</b> | <b>0.486 (0.049), &lt;0.001</b> | <b>-0.026 (0.005), &lt;0.001</b> |
| O94813     | <i>SLIT2</i>   | Slit homolog 2 protein                            | <b>0.654 (0.096), &lt;0.001</b> | <b>0.461 (0.025), &lt;0.001</b> | <b>0.445 (0.041), &lt;0.001</b> | <b>-0.026 (0.004), &lt;0.001</b> |
| P17948     | <i>FLT1</i>    | Vascular endothelial growth factor receptor 1     | <b>0.593 (0.095), &lt;0.001</b> | <b>0.419 (0.026), &lt;0.001</b> | <b>0.433 (0.040), &lt;0.001</b> | <b>-0.023 (0.004), &lt;0.001</b> |
| Q92563     | <i>SPOCK2</i>  | Testican-2                                        | <b>0.574 (0.097), &lt;0.001</b> | <b>0.316 (0.029), &lt;0.001</b> | <b>0.339 (0.042), &lt;0.001</b> | <b>-0.022 (0.004), &lt;0.001</b> |
| P55107     | <i>GDF10</i>   | Growth/differentiation factor 10                  | <b>0.700 (0.118), &lt;0.001</b> | <b>0.445 (0.031), &lt;0.001</b> | <b>0.484 (0.054), &lt;0.001</b> | <b>-0.03 (0.006), &lt;0.001</b>  |
| Q96CG8     | <i>CTHRC1</i>  | Collagen Triple helix repeat-containing protein 1 | <b>0.615 (0.107), &lt;0.001</b> | <b>0.506 (0.026), &lt;0.001</b> | <b>0.395 (0.042), &lt;0.001</b> | <b>-0.024 (0.004), &lt;0.001</b> |
| P78333     | <i>GPC5</i>    | Glypican-5                                        | <b>0.499 (0.097), &lt;0.001</b> | <b>0.360 (0.028), &lt;0.001</b> | <b>0.308 (0.042), &lt;0.001</b> | <b>-0.012 (0.004), 0.002</b>     |
| Q9ULB1     | <i>NRXN1</i>   | Neurexin1                                         | <b>0.498 (0.096), &lt;0.001</b> | <b>0.340 (0.028), &lt;0.001</b> | <b>0.275 (0.042), &lt;0.001</b> | <b>-0.022 (0.004), &lt;0.001</b> |
| Q92765     | <i>FRZB</i>    | Secreted frizzled-related protein 3               | <b>0.518 (0.101), &lt;0.001</b> | <b>0.265 (0.031), &lt;0.001</b> | <b>0.255 (0.045), &lt;0.001</b> | <b>-0.017 (0.004), &lt;0.001</b> |
| O00622     | <i>CCN1</i>    | CCN family member 1                               | <b>0.959 (0.185), &lt;0.001</b> | <b>0.314 (0.060), &lt;0.001</b> | <b>0.436 (0.092), &lt;0.001</b> | <b>-0.024 (0.013), 0.057</b>     |
| Q9BQ16     | <i>SPOCK3</i>  | Testican-3                                        | <b>0.484 (0.098), &lt;0.001</b> | <b>0.362 (0.028), &lt;0.001</b> | <b>0.448 (0.041), &lt;0.001</b> | <b>-0.028 (0.004), &lt;0.001</b> |
| P02743     | <i>APCS</i>    | Serum amyloid P-component                         | <b>0.473 (0.097), &lt;0.001</b> | <b>0.211 (0.030), &lt;0.001</b> | <b>0.282 (0.042), &lt;0.001</b> | <b>-0.024 (0.004), &lt;0.001</b> |
| Q9BXS0     | <i>COL25A1</i> | Collagen alpha-1(XXV) chain                       | <b>0.694 (0.147), &lt;0.001</b> | <b>0.330 (0.044), &lt;0.001</b> | <b>0.271 (0.056), &lt;0.001</b> | <b>-0.017 (0.006), 0.003</b>     |

**Table e-2.** Associations of the *APOE*  $\epsilon 4$ -related proteins with rates of decline in 5 cognitive domains.

| Protein       | Episodic memory        | Semantic memory        | Working memory         | Processing speed                 | Visuospatial ability         |
|---------------|------------------------|------------------------|------------------------|----------------------------------|------------------------------|
|               | Estimate (SE), P-value |                        |                        |                                  |                              |
| <b>P21741</b> | -0.029 (0.005), <0.001 | -0.028 (0.004), <0.001 | -0.017 (0.004), <0.001 | -0.018 (0.004), <0.001           | -0.008 (0.004), 0.035        |
| <b>Q9H4F8</b> | -0.033 (0.005), <0.001 | -0.028 (0.004), <0.001 | -0.018 (0.004), <0.001 | -0.016 (0.004), <0.001           | -0.006 (0.004), 0.105        |
| <b>P05067</b> | -0.032 (0.005), <0.001 | -0.03 (0.004), <0.001  | -0.02 (0.004), <0.001  | -0.02 (0.004), <0.001            | -0.009 (0.004), 0.016        |
| <b>O95631</b> | -0.034 (0.005), <0.001 | -0.031 (0.004), <0.001 | -0.018 (0.004), <0.001 | -0.016 (0.004), <0.001           | -0.008 (0.004), 0.037        |
| <b>Q92743</b> | -0.031 (0.005), <0.001 | -0.022 (0.004), <0.001 | -0.018 (0.004), <0.001 | -0.018 (0.005), <0.001           | <b>-0.012 (0.004), 0.002</b> |
| <b>Q8N474</b> | -0.032 (0.006), <0.001 | -0.03 (0.005), <0.001  | -0.015 (0.005), 0.002  | -0.018 (0.005), <0.001           | -0.01 (0.005), 0.035         |
| <b>O94813</b> | -0.032 (0.005), <0.001 | -0.028 (0.004), <0.001 | -0.018 (0.004), <0.001 | -0.016 (0.005), <0.001           | -0.009 (0.004), 0.03         |
| <b>P17948</b> | -0.029 (0.005), <0.001 | -0.027 (0.004), <0.001 | -0.016 (0.004), <0.001 | -0.013 (0.004), 0.003            | -0.006 (0.004), 0.105        |
| <b>Q92563</b> | -0.026 (0.005), <0.001 | -0.021 (0.004), <0.001 | -0.018 (0.004), <0.001 | -0.013 (0.005), 0.005            | -0.006 (0.004), 0.123        |
| <b>P55107</b> | -0.036 (0.007), <0.001 | -0.036 (0.006), <0.001 | -0.017 (0.005), 0.002  | <b>-0.022 (0.006), &lt;0.001</b> | -0.006 (0.005), 0.255        |
| <b>Q96CG8</b> | -0.03 (0.005), <0.001  | -0.025 (0.004), <0.001 | -0.017 (0.004), <0.001 | -0.013 (0.005), 0.01             | -0.007 (0.004), 0.086        |
| <b>P78333</b> | -0.016 (0.005), <0.001 | -0.019 (0.004), <0.001 | -0.006 (0.004), 0.129  | -0.01 (0.004), 0.034             | 0.003 (0.004), 0.4           |
| <b>Q9ULB1</b> | -0.024 (0.005), <0.001 | -0.022 (0.004), <0.001 | -0.018 (0.004), <0.001 | -0.011 (0.005), 0.013            | -0.01 (0.004), 0.011         |
| <b>Q92765</b> | -0.02 (0.005), <0.001  | -0.019 (0.005), <0.001 | -0.013 (0.004), 0.004  | -0.01 (0.005), 0.041             | -0.009 (0.004), 0.046        |
| <b>O00622</b> | -0.048 (0.012), <0.001 | -0.028 (0.014), 0.05   | -0.014 (0.011), 0.207  | -0.013 (0.012), 0.263            | 0.006 (0.015), 0.7           |
| <b>Q9BQ16</b> | -0.034 (0.005), <0.001 | -0.026 (0.004), <0.001 | -0.018 (0.004), <0.001 | -0.018 (0.004), <0.001           | -0.009 (0.004), 0.016        |
| <b>P02743</b> | -0.027 (0.005), <0.001 | -0.023 (0.004), <0.001 | -0.02 (0.004), <0.001  | -0.013 (0.005), 0.004            | -0.009 (0.004), 0.039        |
| <b>Q9BXS0</b> | -0.021 (0.007), 0.003  | -0.009 (0.005), 0.107  | -0.012 (0.006), 0.042  | -0.012 (0.006), 0.052            | -0.001 (0.005), 0.869        |

Bold numbers indicate significant associations after Bonferroni adjustment.

**Table e-3.** Associations of the *APOE*  $\epsilon 4$ -related proteins with their bulk tissue RNA expression levels.

| <b>Protein</b>            | <b>Gene</b>    | <b>Spearman correlation coefficient</b> | <b>P-value</b>   |
|---------------------------|----------------|-----------------------------------------|------------------|
| <b>P21741</b>             | <i>MDK</i>     | -0.06                                   | 0.144            |
| <b>Q9H4F8</b>             | <i>SMOC1</i>   | 0.05                                    | 0.240            |
| <b>P05067</b>             | <i>APP</i>     | 0.07                                    | 0.118            |
| <b>O95631</b>             | <i>NTN1</i>    | -0.03                                   | 0.516            |
| <b>Q92743</b>             | <i>HTRA1</i>   | <b>0.15</b>                             | <b>&lt;0.001</b> |
| <b>Q8N474</b>             | <i>SFRP1</i>   | 0.07                                    | 0.173            |
| <b>O94813</b>             | <i>SLIT2</i>   | 0.05                                    | 0.285            |
| <b>P17948</b>             | <i>FLT1</i>    | <b>0.17</b>                             | <b>&lt;0.001</b> |
| <b>Q92563</b>             | <i>SPOCK2</i>  | 0.08                                    | 0.052            |
| <b>P55107</b>             | <i>GDF10</i>   | -0.08                                   | 0.119            |
| <b>Q96CG8</b>             | <i>CTHRC1</i>  | 0.03                                    | 0.550            |
| <b>P78333</b>             | <i>GPC5</i>    | 0.12                                    | 0.006            |
| <b>Q9ULB1</b>             | <i>NRXN1</i>   | 0.01                                    | 0.821            |
| <b>Q92765</b>             | <i>FRZB</i>    | 0.09                                    | 0.033            |
| <b>O00622</b>             | <i>CCN1</i>    | 0.23                                    | 0.013            |
| <b>Q9BQ16</b>             | <i>SPOCK3</i>  | <b>0.19</b>                             | <b>&lt;0.001</b> |
| <b>P02743<sup>a</sup></b> | <i>APCS</i>    | <b>NA</b>                               | <b>NA</b>        |
| <b>Q9BXS0</b>             | <i>COL25A1</i> | -0.10                                   | 0.126            |

<sup>a</sup>The RNA expression level of *APCS* did not pass quality control.

**Table e-4.** Associations of *APOE*  $\epsilon 4$  with RNA expression levels of the genes of proteins related to *APOE*  $\epsilon 4$  in participants with valid proteomic data (n=596).

| <b>Protein</b>            | <b>Gene</b>    | <b>Estimate (SE), P-value</b> |
|---------------------------|----------------|-------------------------------|
| <b>P21741</b>             | <i>MDK</i>     | -0.167 (0.073), 0.022         |
| <b>Q9H4F8</b>             | <i>SMOC1</i>   | -0.031 (0.06), 0.604          |
| <b>P05067</b>             | <i>APP</i>     | 0.022 (0.034), 0.504          |
| <b>O95631</b>             | <i>NTN1</i>    | -0.038 (0.046), 0.41          |
| <b>Q92743</b>             | <i>HTRA1</i>   | -0.027 (0.043), 0.53          |
| <b>Q8N474</b>             | <i>SFRP1</i>   | -0.075 (0.06), 0.212          |
| <b>O94813</b>             | <i>SLIT2</i>   | 0.03 (0.038), 0.426           |
| <b>P17948</b>             | <i>FLT1</i>    | -0.039 (0.069), 0.576         |
| <b>Q92563</b>             | <i>SPOCK2</i>  | -0.003 (0.02), 0.894          |
| <b>P55107</b>             | <i>GDF10</i>   | -0.105 (0.063), 0.097         |
| <b>Q96CG8</b>             | <i>CTHRC1</i>  | 0.041 (0.073), 0.572          |
| <b>P78333</b>             | <i>GPC5</i>    | -0.048 (0.058), 0.412         |
| <b>Q9ULB1</b>             | <i>NRXN1</i>   | 0.016 (0.029), 0.578          |
| <b>Q92765</b>             | <i>FRZB</i>    | 0.007 (0.07), 0.925           |
| <b>O00622</b>             | <i>CCN1</i>    | 0.042 (0.081), 0.599          |
| <b>Q9BQ16</b>             | <i>SPOCK3</i>  | -0.001 (0.042), 0.989         |
| <b>P02743<sup>a</sup></b> | <i>APCS</i>    | <b>NA</b>                     |
| <b>Q9BXS0</b>             | <i>COL25A1</i> | 0.038 (0.068), 0.578          |

The estimates (SE), P-values are derived from separate linear regressions with one of the genes' RNA expression as the outcome, *APOE*  $\epsilon 4$  as the covariate, controlled for age at death and sex. None of the associations were significant after Bonferroni-correction.

**Table e-5.** Associations of *APOE ε4* with RNA expression levels of the genes of proteins related to *APOE ε4* in all participants with bulk tissue RNASeq expression data (n=1196).

| <b>Protein</b>            | <b>Gene</b>    | <b>Estimate (SE), P-value</b> |
|---------------------------|----------------|-------------------------------|
| <b>P21741</b>             | <i>MDK</i>     | -0.083 (0.046), 0.072         |
| <b>Q9H4F8</b>             | <i>SMOC1</i>   | 0.033 (0.04), 0.409           |
| <b>P05067</b>             | <i>APP</i>     | 0.03 (0.023), 0.186           |
| <b>O95631</b>             | <i>NTN1</i>    | -0.026 (0.03), 0.382          |
| <b>Q92743</b>             | <i>HTRA1</i>   | -0.002 (0.028), 0.936         |
| <b>Q8N474</b>             | <i>SFRP1</i>   | 0.025 (0.038), 0.517          |
| <b>O94813</b>             | <i>SLIT2</i>   | -0.012 (0.026), 0.639         |
| <b>P17948</b>             | <i>FLT1</i>    | 0.036 (0.046), 0.434          |
| <b>Q92563</b>             | <i>SPOCK2</i>  | -0.017 (0.012), 0.156         |
| <b>P55107</b>             | <i>GDF10</i>   | -0.054 (0.043), 0.202         |
| <b>Q96CG8</b>             | <i>CTHRC1</i>  | -0.021 (0.044), 0.634         |
| <b>P78333</b>             | <i>GPC5</i>    | -0.067 (0.037), 0.071         |
| <b>Q9ULB1</b>             | <i>NRXN1</i>   | -0.023 (0.018), 0.205         |
| <b>Q92765</b>             | <i>FRZB</i>    | -0.044 (0.05), 0.375          |
| <b>O00622</b>             | <i>CCN1</i>    | 0.021 (0.053), 0.69           |
| <b>Q9BQ16</b>             | <i>SPOCK3</i>  | 0.08 (0.027), 0.003           |
| <b>P02743<sup>a</sup></b> | <i>APCS</i>    | <b>NA</b>                     |
| <b>Q9BXS0</b>             | <i>COL25A1</i> | -0.045 (0.045), 0.311         |

The estimates (SE), P-values are derived from separate linear regressions with one of the genes' RNA expression as the outcome, *APOE ε4* as the covariate, controlled for age at death and sex. None of the associations were significant after Bonferroni-correction.



**Table e-6.** Associations of *APOE*  $\epsilon 4$  with single nuclei RNA expression levels of the genes of proteins related to *APOE*  $\epsilon 4$  in participants with proteomic data (n=218).

| Gene          | Astrocytes               | Endothelia               | Excitatory neurons       | Inhibitory neurons       | Microglia                | Oligodendrocytes         | Oligodendrocyte precursor cells |
|---------------|--------------------------|--------------------------|--------------------------|--------------------------|--------------------------|--------------------------|---------------------------------|
|               | Estimate (SE), P-value   |                          |                          |                          |                          |                          |                                 |
| <i>MDK</i>    | -0.079 (0.112),<br>0.482 | <b>NA</b>                | -0.092 (0.073),<br>0.209 | -0.007 (0.091),<br>0.936 | <b>NA</b>                | -0.344 (0.144),<br>0.018 | -0.3 (0.137), 0.029             |
| <i>SMOC1</i>  | 0.07 (0.125),<br>0.579   | <b>NA</b>                | 0.083 (0.108),<br>0.446  | 0.017 (0.071),<br>0.815  | 0.105 (0.175),<br>0.548  | 0.013 (0.124), 0.916     | -0.038 (0.091),<br>0.678        |
| <i>APP</i>    | -0.009 (0.085),<br>0.919 | -0.126 (0.088),<br>0.155 | -0.012 (0.037),<br>0.734 | -0.001 (0.027),<br>0.965 | -0.014 (0.116),<br>0.902 | -0.024 (0.025),<br>0.337 | 0.025 (0.038),<br>0.513         |
| <i>NTN1</i>   | 0.066 (0.092),<br>0.469  | <b>NA</b>                | -0.069 (0.143),<br>0.628 | 0.03 (0.098),<br>0.765   | <b>NA</b>                | <b>NA</b>                | 0.041 (0.055),<br>0.458         |
| <i>HTRA1</i>  | -0.069 (0.076),<br>0.364 | -0.01 (0.159),<br>0.949  | 0.055 (0.221),<br>0.804  | -0.114 (0.045),<br>0.011 | -0.025 (0.088),<br>0.772 | -0.067 (0.052), 0.2      | -0.014 (0.057),<br>0.805        |
| <i>SFRP1</i>  | <b>NA</b>                | <b>NA</b>                | <b>NA</b>                | -0.057 (0.083),<br>0.493 | <b>NA</b>                | -0.004 (0.091),<br>0.969 | 0.194 (0.167),<br>0.246         |
| <i>SLIT2</i>  | 0.086 (0.186),<br>0.644  | -0.233 (0.205),<br>0.258 | 0.093 (0.062),<br>0.134  | 0.103 (0.071),<br>0.148  | -0.065 (0.215),<br>0.764 | -0.008 (0.065),<br>0.906 | 0.156 (0.106),<br>0.144         |
| <i>FLT1</i>   | <b>NA</b>                | -0.073 (0.102),<br>0.478 | <b>NA</b>                | 0.051 (0.07),<br>0.466   | 0.353 (0.235),<br>0.135  | <b>NA</b>                | <b>NA</b>                       |
| <i>SPOCK2</i> | -0.062 (0.053),<br>0.247 | -0.027 (0.132),<br>0.839 | -0.021 (0.055),<br>0.702 | -0.031 (0.043),<br>0.474 | -0.185 (0.169),<br>0.274 | -0.084 (0.207),<br>0.685 | -0.089 (0.062),<br>0.153        |
| <i>GDF10</i>  | -0.038 (0.147),<br>0.793 | <b>NA</b>                | 0.064 (0.092),<br>0.489  | 0.006 (0.083),<br>0.939  | <b>NA</b>                | <b>NA</b>                | <b>NA</b>                       |
| <i>CTHRC1</i> | 0.09 (0.152),<br>0.552   | <b>NA</b>                | -0.041 (0.084),<br>0.626 | 0.032 (0.139),<br>0.818  | <b>NA</b>                | 0.099 (0.154), 0.52      | -0.15 (0.138),<br>0.278         |
| <i>GPC5</i>   | 0.037 (0.058),<br>0.522  | -0.141 (0.2), 0.48       | 0.169 (0.07),<br>0.017   | 0.164 (0.107),<br>0.126  | 0.161 (0.127),<br>0.207  | 0.003 (0.137), 0.98      | 0.134 (0.195),<br>0.492         |
| <i>NRXN1</i>  | 0.057 (0.066),<br>0.39   | 0.172 (0.162),<br>0.288  | 0.066 (0.045),<br>0.146  | 0.079 (0.051),<br>0.124  | 0.133 (0.362),<br>0.713  | 0.077 (0.283), 0.786     | 0.05 (0.061), 0.407             |
| <i>FRZB</i>   | -0.107 (0.17),<br>0.528  | -0.158 (0.193),<br>0.416 | -0.022 (0.056),<br>0.696 | -0.052 (0.078),<br>0.508 | <b>NA</b>                | -0.219 (0.172),<br>0.203 | -0.019 (0.115),<br>0.871        |

|                |                          |                         |                          |                         |                          |                      |                         |
|----------------|--------------------------|-------------------------|--------------------------|-------------------------|--------------------------|----------------------|-------------------------|
| <i>CCN1</i>    | -0.114 (0.132),<br>0.392 | 0.211 (0.259),<br>0.416 | -0.023 (0.136),<br>0.866 | <b>NA</b>               | <b>NA</b>                | <b>NA</b>            | <b>NA</b>               |
| <i>SPOCK3</i>  | 0.04 (0.123),<br>0.745   | 0.014 (0.197),<br>0.943 | 0.18 (0.091),<br>0.049   | 0.063 (0.037),<br>0.091 | 0.1 (0.121), 0.409       | 0.004 (0.047), 0.927 | 0.001 (0.073),<br>0.992 |
| <i>APCS</i>    | <b>NA</b>                | <b>NA</b>               | <b>NA</b>                | <b>NA</b>               | <b>NA</b>                | <b>NA</b>            | <b>NA</b>               |
| <i>COL25A1</i> | -0.131 (0.114),<br>0.252 | <b>NA</b>               | 0.027 (0.062),<br>0.659  | 0 (0.069), 0.995        | -0.088 (0.161),<br>0.585 | 0.199 (0.151), 0.188 | -0.17 (0.094),<br>0.071 |

The estimates (SE), P-values are derived from separate linear regressions (93 models) with one of the genes' RNA expression in one cell as the outcome, *APOE ε4* as the covariate, controlled for age at death and sex. None of the associations were significant after Bonferroni-correction.

**Table e-7.** Associations of *APOE*  $\epsilon 4$  with single nuclei RNA expression levels of the genes of proteins related to *APOE*  $\epsilon 4$  in all participants with single nuclei RNA expression data (n=424).

| Gene          | Astrocytes               | Endothelia               | Excitatory Neurons       | Inhibitory Neurons       | Microglia                      | Oligodendroglia          | Oligodendrocyte precursor cells |
|---------------|--------------------------|--------------------------|--------------------------|--------------------------|--------------------------------|--------------------------|---------------------------------|
|               | Estimate (SE), P-value   |                          |                          |                          |                                |                          |                                 |
| <i>MDK</i>    | -0.034 (0.076),<br>0.66  | <b>NA</b>                | -0.058 (0.049),<br>0.241 | -0.028 (0.058),<br>0.626 | <b>NA</b>                      | -0.167 (0.108),<br>0.12  | -0.201 (0.095),<br>0.035        |
| <i>SMOC1</i>  | 0.135 (0.082),<br>0.103  | <b>NA</b>                | 0.035 (0.075),<br>0.639  | 0.017 (0.045),<br>0.713  | -0.027 (0.117),<br>0.821       | 0.105 (0.08), 0.19       | -0.03 (0.06), 0.619             |
| <i>APP</i>    | -0.008 (0.063),<br>0.902 | -0.063 (0.054),<br>0.241 | -0.005 (0.024),<br>0.825 | -0.003 (0.019),<br>0.877 | 0.021 (0.081),<br>0.798        | 0.006 (0.017),<br>0.715  | 0.032 (0.026),<br>0.212         |
| <i>NTN1</i>   | 0.077 (0.063),<br>0.221  | <b>NA</b>                | 0.011 (0.096),<br>0.908  | -0.022 (0.065),<br>0.735 | <b>NA</b>                      | <b>NA</b>                | 0.015 (0.036),<br>0.672         |
| <i>HTRA1</i>  | -0.022 (0.052),<br>0.671 | -0.006 (0.11),<br>0.957  | -0.018 (0.151),<br>0.905 | -0.071 (0.03),<br>0.018  | -0.02 (0.057),<br>0.72         | -0.01 (0.036),<br>0.783  | 0.042 (0.039), 0.28             |
| <i>SFRP1</i>  | <b>NA</b>                | <b>NA</b>                | <b>NA</b>                | -0.01 (0.056),<br>0.858  | <b>NA</b>                      | -0.083 (0.061),<br>0.172 | 0.133 (0.107),<br>0.215         |
| <i>SLIT2</i>  | 0.031 (0.125),<br>0.805  | -0.069 (0.14),<br>0.625  | 0.106 (0.041),<br>0.01   | 0.078 (0.047),<br>0.097  | -0.16 (0.147),<br>0.278        | -0.02 (0.043),<br>0.648  | 0.077 (0.071),<br>0.277         |
| <i>FLT1</i>   | <b>NA</b>                | 0.002 (0.069),<br>0.981  | <b>NA</b>                | -0.061 (0.049),<br>0.216 | <b>0.61 (0.163),<br/>0.002</b> | <b>NA</b>                | <b>NA</b>                       |
| <i>SPOCK2</i> | -0.009 (0.035),<br>0.788 | -0.078 (0.079),<br>0.321 | -0.027 (0.039),<br>0.489 | -0.012 (0.029),<br>0.69  | -0.14 (0.119),<br>0.241        | -0.112 (0.147),<br>0.448 | -0.023 (0.048),<br>0.638        |
| <i>GDF10</i>  | -0.149 (0.096),<br>0.121 | <b>NA</b>                | 0.044 (0.062),<br>0.477  | -0.04 (0.059),<br>0.496  | <b>NA</b>                      | <b>NA</b>                | <b>NA</b>                       |
| <i>CTHRC1</i> | 0.047 (0.103),<br>0.648  | <b>NA</b>                | -0.046 (0.056),<br>0.415 | 0.005 (0.088),<br>0.955  | <b>NA</b>                      | -0.018 (0.102),<br>0.863 | -0.06 (0.089),<br>0.502         |
| <i>GPC5</i>   | 0.009 (0.039),<br>0.821  | -0.013 (0.136),<br>0.924 | 0.12 (0.046), 0.01       | 0.065 (0.069),<br>0.347  | -0.016 (0.086),<br>0.854       | -0.049 (0.088),<br>0.581 | 0.136 (0.128),<br>0.287         |
| <i>NRXN1</i>  | -0.032 (0.047),<br>0.498 | 0.029 (0.11),<br>0.795   | 0.046 (0.03),<br>0.132   | 0.037 (0.034),<br>0.27   | 0.032 (0.251),<br>0.897        | -0.039 (0.195),<br>0.84  | 0.008 (0.04), 0.837             |
| <i>FRZB</i>   | -0.061 (0.107),<br>0.572 | -0.168 (0.134),<br>0.212 | 0.026 (0.04),<br>0.521   | 0.015 (0.054),<br>0.787  | <b>NA</b>                      | -0.183 (0.115),<br>0.112 | 0.056 (0.079),<br>0.481         |

|                |                          |                          |                        |                          |                          |                         |                          |
|----------------|--------------------------|--------------------------|------------------------|--------------------------|--------------------------|-------------------------|--------------------------|
| <i>CCN1</i>    | -0.006 (0.091),<br>0.945 | -0.013 (0.164),<br>0.937 | 0.1 (0.096), 0.298     | <b>NA</b>                | <b>NA</b>                | <b>NA</b>               | <b>NA</b>                |
| <i>SPOCK3</i>  | 0.003 (0.084),<br>0.975  | -0.027 (0.126),<br>0.828 | 0.126 (0.06),<br>0.037 | 0.024 (0.025),<br>0.333  | -0.018 (0.078),<br>0.816 | 0.048 (0.032),<br>0.136 | -0.006 (0.046),<br>0.902 |
| <i>APCS</i>    | <b>NA</b>                | <b>NA</b>                | <b>NA</b>              | <b>NA</b>                | <b>NA</b>                | <b>NA</b>               | <b>NA</b>                |
| <i>COL25A1</i> | -0.089 (0.075),<br>0.232 | <b>NA</b>                | 0.029 (0.04),<br>0.462 | -0.027 (0.046),<br>0.564 | -0.132 (0.101),<br>0.191 | 0.089 (0.102),<br>0.381 | -0.04 (0.061),<br>0.513  |

The estimates (SE), P-values are derived from separate linear regressions (93 models) with one of the genes' RNA expression in one cell as the outcome, *APOE*  $\epsilon 4$  as the covariate, controlled for age at death and sex. The analyses indicated that only the association between *APOE*  $\epsilon 4$  and single nuclei RNA expression of *FLT1* (Vascular endothelial growth factor receptor 1) in microglia was significant after Bonferroni-correction.

**Table e-8.** Associations of the 18 *APOE*  $\epsilon 4$ -related proteins with AD polygenic risk scores that included risk variants except *APOE*  $\epsilon 4$ .

| Protein             | Gene           | AD risk score ( $P < 5 \times 10^{-8}$ ) | AD risk score ( $P < 1$ )       |
|---------------------|----------------|------------------------------------------|---------------------------------|
|                     |                | Estimate (SE), P-value                   |                                 |
| P21741              | <i>MDK</i>     | 0.106 (0.042), 0.011                     | 0.09 (0.042), 0.031             |
| Q9H4F8              | <i>SMOC1</i>   | 0.102 (0.042), 0.015                     | 0.112 (0.042), 0.008            |
| P05067              | <i>APP</i>     | 0.098 (0.042), 0.02                      | 0.111 (0.042), 0.009            |
| O95631              | <i>NTN1</i>    | 0.117 (0.042), 0.005                     | 0.091 (0.042), 0.031            |
| Q92743              | <i>HTRA1</i>   | 0.025 (0.042), 0.557                     | 0.085 (0.042), 0.043            |
| Q8N474              | <i>SFRP1</i>   | 0.104 (0.047), 0.026                     | <b>0.191 (0.047), &lt;0.001</b> |
| O94813              | <i>SLIT2</i>   | 0.106 (0.042), 0.012                     | 0.092 (0.042), 0.029            |
| P17948              | <i>FLT1</i>    | 0.084 (0.042), 0.045                     | 0.111 (0.042), 0.008            |
| Q92563              | <i>SPOCK2</i>  | <b>0.168 (0.042), &lt;0.001</b>          | 0.05 (0.042), 0.24              |
| P55107              | <i>GDF10</i>   | 0.125 (0.056), 0.025                     | 0.151 (0.055), 0.006            |
| Q96CG8              | <i>CTHRC1</i>  | 0.049 (0.047), 0.294                     | 0.087 (0.047), 0.064            |
| P78333              | <i>GPC5</i>    | 0.031 (0.042), 0.463                     | 0.089 (0.042), 0.033            |
| Q9ULB1              | <i>NRXN1</i>   | <b>0.131 (0.042), 0.002</b>              | 0.022 (0.042), 0.6              |
| Q92765              | <i>FRZB</i>    | 0.097 (0.045), 0.031                     | 0.058 (0.045), 0.199            |
| O00622              | <i>CCN1</i>    | 0.111 (0.081), 0.173                     | 0.203 (0.087), 0.021            |
| Q9BQ16              | <i>SPOCK3</i>  | 0.073 (0.043), 0.089                     | <b>0.167 (0.042), &lt;0.001</b> |
| P02743 <sup>a</sup> | <i>APCS</i>    | 0.054 (0.042), 0.194                     | 0.082 (0.042), 0.05             |
| Q9BXS0              | <i>COL25A1</i> | 0.183 (0.066), 0.006                     | 0.071 (0.068), 0.298            |

In two series of 18 separate linear regressions the associations of two AD polygenic risk score, derived by applying two p-value thresholds for sequence variants inclusion:  $< 5 \times 10^{-8}$  and  $< 1$ , were examined with the levels of 18 *APOE*  $\epsilon 4$ -related proteins. All the models were controlled for age at death and sex.

**Table e-9.** Protein levels and number of missing of 18 *APOE*  $\epsilon 4$ -related proteins.

| <b>Protein</b> | <b>Gene</b>    | <b>Number of missing</b> | <b>Mean</b> | <b>SD</b> |
|----------------|----------------|--------------------------|-------------|-----------|
| <b>P21741</b>  | <i>MDK</i>     | 0                        | 0.0053      | 0.9988    |
| <b>Q9H4F8</b>  | <i>SMOC1</i>   | 0                        | 0.0037      | 1         |
| <b>P05067</b>  | <i>APP</i>     | 8                        | 0.0043      | 0.9997    |
| <b>O95631</b>  | <i>NTN1</i>    | 8                        | 0.0057      | 0.9983    |
| <b>Q92743</b>  | <i>HTRA1</i>   | 0                        | 0.0035      | 1.0004    |
| <b>Q8N474</b>  | <i>SFRP1</i>   | 148                      | 0.0062      | 0.9957    |
| <b>O94813</b>  | <i>SLIT2</i>   | 8                        | 0.0064      | 0.9973    |
| <b>P17948</b>  | <i>FLT1</i>    | 0                        | 0.0056      | 0.9984    |
| <b>Q92563</b>  | <i>SPOCK2</i>  | 8                        | 0.0024      | 1.0006    |
| <b>P55107</b>  | <i>GDF10</i>   | 230                      | 0.0025      | 0.9988    |
| <b>Q96CG8</b>  | <i>CTHRC1</i>  | 112                      | 0.0038      | 0.9993    |
| <b>P78333</b>  | <i>GPC5</i>    | 0                        | 0.0047      | 0.9992    |
| <b>Q9ULB1</b>  | <i>NRXN1</i>   | 0                        | 0.0007      | 1.0014    |
| <b>Q92765</b>  | <i>FRZB</i>    | 61                       | 0.0019      | 0.9991    |
| <b>O00622</b>  | <i>CCN1</i>    | 450                      | 0.0023      | 1.0058    |
| <b>Q9BQ16</b>  | <i>SPOCK3</i>  | 21                       | 0.001       | 0.9997    |
| <b>P02743</b>  | <i>APCS</i>    | 0                        | 0.0006      | 1.001     |
| <b>Q9BXS0</b>  | <i>COL25A1</i> | 343                      | 0           | 1         |

**Table e-10.** Characteristic of 302 participants who had non-missing levels of 15 *APOE*  $\epsilon 4$ -related proteins.

| Covariates                                           | Included<br>(n=302) | Excluded<br>(n=294) | Statistics, p-value              |
|------------------------------------------------------|---------------------|---------------------|----------------------------------|
|                                                      | Mean (SD) or n (%)  |                     |                                  |
| Age at death baseline, years, Mean (SD)              | 90.2 (6.4)          | 89.0 (6.3)          | t=-2.14, <b>p=0.033</b>          |
| Women, n (%)                                         | 218 (72)            | 192 (65)            | $\chi^2=3.28$ , 0.070            |
| Education, years, Mean (SD)                          | 15.2 (3.4)          | 15.6 (3.4)          | t=1.45, 0.147                    |
| White non-Hispanic, n (%)                            | 295 (98)            | 281 (96)            | $\chi^2=2.03$ , 0.154            |
| <i>APOE</i> $\epsilon 4$                             | 70 (23)             | 63 (22)             | $\chi^2=0.127$ , 0.722           |
| <i>APOE</i> genotype                                 |                     |                     | $\chi^2=6.0$ , 0.308             |
| $\epsilon 2\epsilon 2$ , n (%)                       | 1 (0.3)             | 4 (1)               |                                  |
| $\epsilon 2\epsilon 3$ , n (%)                       | 44 (15)             | 32 (11)             |                                  |
| $\epsilon 3\epsilon 3$ , n (%)                       | 187 (62)            | 188 (66)            |                                  |
| $\epsilon 2\epsilon 4$ , n (%)                       | 6 (2)               | 6 (2)               |                                  |
| $\epsilon 3\epsilon 4$ , n (%)                       | 63 (11)             | 53 (18)             |                                  |
| $\epsilon 4\epsilon 4$ , n (%)                       | 1 (0.3)             | 4 (1)               |                                  |
| Mini Mental State Examination score, Mean (SD)       | 21.9 (8.4)          | 22.9 (8.1)          | $\chi^2$ (KW)=3.89, <b>0.049</b> |
| Global cognition                                     | -0.85 (1.10)        | -0.73 (1.05)        | t=1.43, 0.155                    |
| Alzheimer's dementia, n (%)                          | 109 (36)            | 91 (31)             | $\chi^2=1.77$ , 0.184            |
| Pathological diagnosis of Alzheimer's disease, n (%) | 115 (38)            | 110 (37)            | $\chi^2=0.028$ , 0.867           |
| <b>Immunohistochemical assessments</b>               |                     |                     |                                  |
| Square root of Amyloid- $\beta$ load, Mean (SD)      | 1.09 (0.79)         | 1.04 (0.77)         | t=-0.69, 0.493                   |
| Square root of Tau tangle density, Mean (SD)         | 1.51 (1.11)         | 1.36 (1.09)         | t=-1.75, 0.080                   |
| <b>Proteins</b>                                      |                     |                     |                                  |
| P21741                                               | -0.006 (0.945)      | 0.017 (1.052)       | t=0.28, 0.782                    |
| Q9H4F8                                               | -0.004 (1.012)      | 0.011 (0.989)       | t=0.18, 0.854                    |
| P05067                                               | -0.004 (0.990)      | 0.013 (1.011)       | t=0.2, 0.841                     |
| O95631                                               | -0.003 (0.935)      | 0.015 (1.062)       | t=0.22, 0.827                    |
| Q92743                                               | -0.003 (1.055)      | 0.01 (0.943)        | t=0.17, 0.866                    |
| Q8N474                                               | -0.002 (0.972)      | 0.023 (1.046)       | t=0.25, 0.800                    |
| O94813                                               | -0.002 (0.998)      | 0.015 (0.999)       | t=0.2, 0.840                     |
| P17948                                               | -0.012 (0.991)      | 0.024 (1.007)       | t=0.44, 0.657                    |

|        |                |                |                |
|--------|----------------|----------------|----------------|
| Q92563 | -0.002 (0.973) | 0.007 (1.03)   | t=-0.1, 0.920  |
| P55107 | -0.010 (0.990) | 0.013 (1.008)  | t=0.21, 0.832  |
| Q96CG8 | -0.003 (0.932) | 0.015 (1.105)  | t=0.18, 0.857  |
| P78333 | 0.008 (0.962)  | 0.001 (1.038)  | t=-0.08, 0.933 |
| Q9ULB1 | -0.013 (1.041) | 0.015 (0.96)   | t=0.34, 0.737  |
| Q92765 | 0.006 (1.038)  | -0.003 (0.949) | t=-0.1, 0.924  |
| O00622 | -0.045 (1.114) | 0.045 (0.904)  | t=0.54, 0.592  |
| Q9BQ16 | -0.008 (0.965) | 0.011 (1.039)  | t=0.22, 0.823  |
| P02743 | -0.008 (0.974) | 0.009 (1.029)  | t=0.21, 0.831  |
| Q9BXS0 | 0 (1.026)      | 0 (0.961)      | t=0, 1         |

The covariates were compared across the groups by t-test, chi-square, or Kruskal-Wallis tests.



**Table e-11.** Effect sizes of the 5 and 2 *APOE*  $\epsilon 4$ -related proteins associated with amyloid- $\beta$  and tau tangles, respectively.

| Protein       | Gene          | Cohen's $f^2$    |             |
|---------------|---------------|------------------|-------------|
|               |               | Amyloid- $\beta$ | Tau tangles |
| <b>Q9H4F8</b> | <i>SMOC1</i>  | 0.013            | –           |
| <b>O95631</b> | <i>NTN1</i>   | 0.030            | 0.098       |
| <b>Q92743</b> | <i>HTRA1</i>  | 0.013            | –           |
| <b>Q8N474</b> | <i>SFRP1</i>  | 0.031            | –           |
| <b>Q9ULB1</b> | <i>NRXN1</i>  | 0.017            | –           |
| <b>Q9BQ16</b> | <i>SPOCK3</i> | –                | 0.033       |

**Table e-12.** Associations of *APOE*  $\epsilon 4$  with amyloid- $\beta$  ( $A\beta$ ) and tau tangle with and without controlling for *APOE*  $\epsilon 4$ -related proteins.

| Model | Model terms                         | Association of <i>APOE</i> $\epsilon 4$ with |                                 |
|-------|-------------------------------------|----------------------------------------------|---------------------------------|
|       |                                     | Amyloid- $\beta$                             | Tau tangle                      |
|       |                                     | Estimate (SE), P-value                       |                                 |
| 1     | <i>APOE</i> $\epsilon 4$            | <b>0.550 (0.102), &lt;0.001</b>              | <b>0.735 (0.141), &lt;0.001</b> |
| 2     | Netrin-1                            | <b>0.378 (0.063), &lt;0.001</b>              | <b>0.409 (0.074), &lt;0.001</b> |
|       | Secreted frizzled-related protein 1 | <b>0.256 (0.060), &lt;0.001</b>              | NA                              |
|       | Testican-3                          | NA                                           | <b>0.239 (0.072), 0.001</b>     |
| 3     | <i>APOE</i> $\epsilon 4$            | 0.097 (0.076), 0.198                         | <b>0.371 (0.132), 0.005</b>     |
|       | Netrin-1                            | <b>0.367 (0.063), &lt;0.001</b>              | <b>0.347 (0.077), &lt;0.001</b> |
|       | Secreted frizzled-related protein 1 | <b>0.253 (0.060), &lt;0.001</b>              | NA                              |
|       | Testican-3                          | NA                                           | <b>0.246 (0.071), &lt;0.001</b> |
| 4     | $A\beta$                            | NA                                           | <b>0.636 (0.071), &lt;0.001</b> |
| 5     | <i>APOE</i> $\epsilon 4$            | NA                                           | <b>0.340 (0.131), 0.010</b>     |
|       | Netrin-1                            |                                              | <b>0.191 (0.095), 0.045</b>     |
|       | Secreted frizzled-related protein 1 |                                              | NA                              |
|       | Testican-3                          |                                              | <b>0.242 (0.071), &lt;0.001</b> |
|       | $A\beta$                            |                                              | <b>0.270 (0.098), 0.006</b>     |

**Table e-13.** Associations of *APOE*  $\epsilon 4$ -related proteins with pathological diagnosis of AD and with non-AD brain pathologies.

| Gene          | AD                                            | TDP-43                          | Hip. sclerosis        | Lewy bodies                     | Macroinf.              | Microinf.              | Atheroscl.                    | Arterioscl.            | CAA                             |
|---------------|-----------------------------------------------|---------------------------------|-----------------------|---------------------------------|------------------------|------------------------|-------------------------------|------------------------|---------------------------------|
|               | Odds Ratio (95% confidence interval), p-value |                                 |                       |                                 |                        |                        |                               |                        |                                 |
| <i>MDK</i>    | <b>7.1 (5.2-9.6), &lt;0.001</b>               | <b>1.5 (1.3-1.9), &lt;0.001</b> | 1.1 (0.82-1.5), 0.481 | 1.3 (1.1-1.6), 0.004            | 1.0 (0.85-1.2), 0.929  | 1.1 (0.88-1.3), 0.585  | 0.88 (0.74-1.1), 0.166        | 0.96 (0.80-1.1), 0.63  | <b>1.8 (1.5-2.3), &lt;0.001</b> |
| <i>SMOC1</i>  | <b>6.6 (4.9-8.9), &lt;0.001</b>               | <b>1.6 (1.3-1.9), &lt;0.001</b> | 1.2 (0.87-1.6), 0.28  | <b>1.4 (1.2-1.7), &lt;0.001</b> | 1.0 (0.85-1.2), 0.894  | 1.1 (0.94-1.3), 0.204  | 0.93 (0.78-1.1), 0.392        | 0.99 (0.83-1.2), 0.886 | <b>1.9 (1.6-2.3), &lt;0.001</b> |
| <i>APP</i>    | <b>6.1 (4.5-8.2), &lt;0.001</b>               | <b>1.4 (1.2-1.7), &lt;0.001</b> | 1.1 (0.85-1.6), 0.372 | <b>1.4 (1.1-1.6), 0.002</b>     | 1.0 (0.86-1.2), 0.744  | 1.2 (0.98-1.4), 0.088  | 0.97 (0.82-1.2), 0.758        | 1.0 (0.85-1.2), 0.852  | <b>1.8 (1.5-2.2), &lt;0.001</b> |
| <i>NTN1</i>   | <b>6.8 (4.9-9.3), &lt;0.001</b>               | <b>1.5 (1.3-1.9), &lt;0.001</b> | 1.2 (0.89-1.6), 0.215 | <b>1.4 (1.2-1.7), &lt;0.001</b> | 1.0 (0.84-1.2), 0.976  | 1.1 (0.91-1.3), 0.365  | 0.91 (0.76-1.1), 0.268        | 0.99 (0.83-1.2), 0.911 | <b>1.8 (1.4-2.1), &lt;0.001</b> |
| <i>HTRA1</i>  | <b>2.5 (2.0-3.1), &lt;0.001</b>               | <b>1.4 (1.2-1.7), &lt;0.001</b> | 1.2 (0.91-1.6), 0.174 | 1.3 (1.1-1.6), 0.005            | 1.1 (0.93-1.3), 0.258  | 1.2 (0.99-1.4), 0.065  | 0.99 (0.83-1.2), 0.867        | 1.1 (0.91-1.3), 0.384  | <b>1.7 (1.4-2.1), &lt;0.001</b> |
| <i>SFRP1</i>  | <b>5.0 (3.7-6.8), &lt;0.001</b>               | <b>1.4 (1.1-1.7), 0.006</b>     | 1.3 (0.93-1.8), 0.126 | <b>1.4 (1.1-1.8), 0.002</b>     | 1.1 (0.86-1.3), 0.6    | 1.2 (0.95-1.4), 0.147  | 1.0 (0.85-1.3), 0.75          | 1.0 (0.83-1.2), 0.904  | <b>1.8 (1.4-2.3), &lt;0.001</b> |
| <i>SLIT2</i>  | <b>4.0 (3.0-5.2), &lt;0.001</b>               | <b>1.4 (1.2-1.7), &lt;0.001</b> | 1.1 (0.81-1.5), 0.554 | <b>1.4 (1.2-1.7), &lt;0.001</b> | 0.95 (0.79-1.1), 0.537 | 1.2 (0.97-1.4), 0.098  | 0.84 (0.7-1), 0.058           | 0.97 (0.82-1.2), 0.777 | <b>1.8 (1.5-2.2), &lt;0.001</b> |
| <i>FLT1</i>   | <b>3.1 (2.4-3.9), &lt;0.001</b>               | <b>1.4 (1.2-1.7), &lt;0.001</b> | 1.2 (0.9-1.6), 0.202  | 1.3 (1-1.5), 0.018              | 0.98 (0.83-1.2), 0.834 | 0.99 (0.82-1.2), 0.876 | 0.94 (0.79-1.1), 0.456        | 0.90 (0.76-1.1), 0.253 | <b>1.6 (1.3-1.9), &lt;0.001</b> |
| <i>SPOCK2</i> | <b>2.4 (1.9-3.0), &lt;0.001</b>               | <b>1.4 (1.2-1.7), &lt;0.001</b> | 1.3 (0.93-1.7), 0.129 | <b>1.5 (1.3-1.9), &lt;0.001</b> | 1.1 (0.91-1.3), 0.363  | 0.98 (0.81-1.2), 0.805 | 0.85 (0.71-1), 0.063          | 0.97 (0.81-1.2), 0.700 | <b>1.4 (1.2-1.7), &lt;0.001</b> |
| <i>GDF10</i>  | <b>5.7 (3.8-8.6), &lt;0.001</b>               | 1.4 (1.1-1.8), 0.009            | 1.3 (0.87-1.9), 0.207 | 1.4 (1.1-1.8), 0.006            | 1.1 (0.88-1.4), 0.419  | 1.1 (0.84-1.3), 0.669  | 0.89 (0.72-1.1), 0.328        | 0.94 (0.75-1.2), 0.563 | <b>1.4 (1.1-1.8), 0.002</b>     |
| <i>CTHRC1</i> | <b>4.9 (3.7-6.6), &lt;0.001</b>               | <b>1.5 (1.2-1.8), &lt;0.001</b> | 1.2 (0.83-1.6), 0.396 | <b>1.4 (1.1-1.7), 0.002</b>     | 1.0 (0.86-1.3), 0.686  | 0.99 (0.81-1.2), 0.897 | 0.95 (0.78-1.2), 0.604        | 0.98 (0.80-1.2), 0.805 | <b>1.6 (1.3-2), &lt;0.001</b>   |
| <i>GPC5</i>   | <b>2.4 (1.9-2.9), &lt;0.001</b>               | 1.2 (1.0-1.5), 0.032            | 1.1 (0.81-1.5), 0.574 | 1 (0.87-1.3), 0.619             | 0.93 (0.78-1.1), 0.412 | 1.1 (0.89-1.3), 0.495  | 0.86 (0.72-1), 0.082          | 0.88 (0.73-1), 0.134   | <b>1.4 (1.2-1.7), &lt;0.001</b> |
| <i>NRXN1</i>  | <b>2.2 (1.8-2.8), &lt;0.001</b>               | 1.2 (1.0-1.5), 0.039            | 1.2 (0.89-1.6), 0.227 | 1.1 (0.93-1.4), 0.213           | 1.0 (0.84-1.2), 0.97   | 1.1 (0.9-1.3), 0.388   | <b>0.76 (0.64-0.9), 0.002</b> | 0.88 (0.74-1), 0.138   | 1.2 (1.0-1.4), 0.052            |
| <i>FRZB</i>   | <b>2.0 (1.6-2.5), &lt;0.001</b>               | 1.2 (1.0-1.5), 0.035            | 1.1 (0.81-1.6), 0.489 | 1.3 (1-1.5), 0.016              | 1.1 (0.92-1.3), 0.294  | 1.1 (0.88-1.3), 0.514  | 1.0 (0.87-1.2), 0.670         | 1.0 (0.86-1.2), 0.700  | <b>1.7 (1.4-2.1), &lt;0.001</b> |

|                |                                     |                                     |                           |                                     |                           |                            |                            |                            |                                     |
|----------------|-------------------------------------|-------------------------------------|---------------------------|-------------------------------------|---------------------------|----------------------------|----------------------------|----------------------------|-------------------------------------|
| <i>CCN1</i>    | <b>2.9 (1.6-5.1),<br/>&lt;0.001</b> | 1.5 (1.1-2.2),<br>0.024             | 1.3 (0.78-<br>2.2), 0.318 | 1.2 (0.83-<br>1.7), 0.331           | 1.2 (0.86-<br>1.7), 0.272 | 1.3 (0.92-<br>1.9), 0.137  | 0.90 (0.63-<br>1.3), 0.590 | 0.99 (0.71-<br>1.4), 0.972 | <b>2.6 (1.6-4.1),<br/>&lt;0.001</b> |
| <i>SPOCK3</i>  | <b>2.8 (2.3-3.6),<br/>&lt;0.001</b> | <b>1.5 (1.2-1.8),<br/>&lt;0.001</b> | 1.1 (0.81-<br>1.5), 0.501 | <b>1.6 (1.3-1.9),<br/>&lt;0.001</b> | 1.0 (0.85-<br>1.2), 0.872 | 1.1 (0.93-<br>1.3), 0.238  | 0.98 (0.82-<br>1.2), 0.832 | 1.1 (0.90-<br>1.3), 0.390  | <b>1.6 (1.3-1.9),<br/>&lt;0.001</b> |
| <i>APCS</i>    | <b>1.8 (1.4-2.2),<br/>&lt;0.001</b> | 1.2 (1.0-1.5),<br>0.036             | 1.1 (0.81-<br>1.5), 0.535 | 1.2 (0.99-<br>1.4), 0.057           | 1.2 (0.97-<br>1.4), 0.111 | 1.1 (0.92-<br>1.3), 0.268  | 1.1 (0.94-<br>1.3), 0.217  | 1.1 (0.92-<br>1.3), 0.308  | <b>1.5 (1.3-1.9),<br/>&lt;0.001</b> |
| <i>COL25A1</i> | <b>2.9 (2.0-4.3),<br/>&lt;0.001</b> | 1.1 (0.81-<br>1.4), 0.623           | 1.5 (1.0-2.4),<br>0.052   | 1.4 (1.1-1.9),<br>0.014             | 1.0 (0.78-<br>1.3), 0.877 | 0.87 (0.66-<br>1.2), 0.349 | 0.93 (0.71-<br>1.2), 0.571 | 0.90 (0.68-<br>1.2), 0.442 | 1.2 (0.87-<br>1.6), 0.295           |

In 9 series of logistic regression models, we examined the associations of 18 *APOE*  $\epsilon 4$ -related proteins with pathologic AD and non-AD brain pathologies in separate models. In each model, one of the *APOE*  $\epsilon 4$ -related proteins comprised the model term and the outcome was pathologic AD or one of the non-AD brain pathologies. All the models were controlled for age at death and sex.
